# Supplementary material for: Gas-Ice Partitioning Coefficients of Carbonyls during Diffusional Ice Crystal Growth
Source: Copernicus journal article supplement (doi:10.5194/egusphere-2025-1425), 2025-04-03
Supplement: Supplementary file [file egusphere-2025-1425-RC2-supplement.pdf]

1    **“Gas-ice partitioning coefficients of carbonyls during diffusional ice crystal growth”**

2    **By J. Seymore et al. (2025) for EGU sphere**

3    Reviewed by Jeff Snider, University of Wyoming

4    **Overall**

5    The authors describe a laboratory setup and use it to characterize the amount of organic vapor  
6    incorporated into ice grown by deposition. This reviewer participated in a similar study ~ 20 years ago.  
7    These are not easy measurements to make. Interpreting the results is also difficult.

8    One of my major critiques concerns the tentative conclusion that a surface layer is the “single dominant  
9    influence” on uptake. This runs counter to the discussion of how uptake might be controlled by  
10   accommodation or affinity within bulk ice.

11   The authors should consider my critiques and reply with a revised manuscript.

## 12 Major Critiques:

13 On L276, you say that “Positive values of DG indicate the analyte favors the gas phase while negative values  
14 of DG indicate the analyte favors the ice phase. Even lower, more negative values of DG would indicate  
15 more efficient uptake of the analyte into the ice phase.” Also, on L330, you say “Values of  $K > 1$ ....indicate  
16 net uptake of the compound into the ice phase. Conversely, values of  $K < 1$ ...indicate negligible uptake and  
17 that the compound favors remaining in the gas phase.” And, on L376, you say that “...DG>0 indicates  
18 unfavorable uptake of the species into the ice phase while DG<0 indicates favorable uptake in the ice  
19 phase.”

20 As I demonstrate below, your statements are illogical for a system with an amount of ice which is  
21 magnitudes smaller than the amount of gas. I will symbolize these amounts as volumes ( $V_s$  and  $V_g$ ) and will  
22 insist that  $V_g/V_s \gg 1$ . Also, I note that  $V_g \gg V_s$  is the situation within clouds. With these constraints, and  
23 assuming sufficient time for equilibration, the  $K$  you report allows for determination of analyte amount (as a  
24 mole count) within the solid ( $K C_g V_s$ ), within the gas ( $C_g V_g$ ), and the fraction of analyte within the solid.

25 Fraction of analyte within the solid =  $K C_g V_s / (K C_g V_s + C_g V_g) = K / (K + V_g/V_s)$

26 My point is this: Since  $K$  is not large compared to 1 (Fig. 4), and  $V_g/V_s \gg 1$  is the situation within clouds, it  
27 does not make sense to say that “negative values of DG indicate the analyte favors the ice phase”, or that  
28 “Values of  $K > 1$ ....indicate net uptake of the compound into the ice phase”, or that “DG<0 indicates  
29 favorable uptake in the ice phase.” Also, while it is logical to say that “Positive values of DG indicate the  
30 analyte favors the gas phase”, and that “Conversely, values of  $K < 1$ ...indicate negligible uptake and that the  
31 compound favors remaining in the gas phase”, and “DG>0 indicates unfavorable uptake of the species into  
32 the ice phase”, these last statements are also true for a  $K$  that is magnitudes larger than 1.

33 In summary, you need to rewrite these sections of text. A suggestion: Think of DG is a placeholder for  $K$ ,  
34 and not as an indicator of how uptake alters the partitioning of the analyte within clouds. If you do not want  
35 to focus on clouds please recognize that it is an unusual experimental setup that allows for  $V_g/V_s \sim 1$  while  
36 also assuring time for equilibration.

37

38 Related to the previous comments and critique:

39 1) Since partitioning is strongly on the side of gas-phase, I don't accept your assertion that uptake into ice  
40 "...may be relevant as an influence on vertical tracer transport" in the Conclusion.

41 2) My formulation of partitioning comes from Brimblecombe and Dawson  
42 (<https://doi.org/10.1007/BF00127265>). As far as I can tell, they were the first to put the concept into the  
43 literature.

44 3) There is a treatment of partitioning in the atmospheric chemistry textbooks. One of these is Lamb and  
45 Verlinda (Physics and Chemistry of Clouds, Cambridge University Press, 2011; see pp. 166-168).

46 4) I recommend that you report your ice uptake coefficient with dimension of  $\text{mol m}^{-3} \text{Pa}^{-1}$ . This is your  
47 framework for the Henry Law discussion (Equations 5 and 6). With this change you can eliminate a  
48 confusing sentence (L210-L211). It would also eliminate the need for a translation from a dimensionless K  
49 to dimensional K, in the Conclusion.

50 L134 says that  $S_i = 1.5$  was a constraint in all experiments. This implies that either deposition or  
 51 condensation can occur. I checked my assertion here:

| 52 | T,[K]  | Si,[-] | ei(T),[Pa] | e,[Pa] | es(T),[Pa] | RH,[%] |
|----|--------|--------|------------|--------|------------|--------|
| 53 | 253.15 | 1.50   | 103.       | 155.   | 125.       | 123.   |
| 54 | 243.15 | 1.50   | 38.        | 57.    | 51.        | 112.   |
| 55 | 233.15 | 1.50   | 13.        | 19.    | 19.        | 101.   |

56 Note that the relative humidity (relative to saturation over liquid water) exceeds 100 % at all temperatures (-  
 57 20, -30, and -40 °C). Since you are using “tank” air, it is unlikely that droplets formed, impacted, and  
 58 contributed to the ice deposit via riming.

59 I recommend that you consider the following as a process that may have occurred in your experimental  
 60 setup:

61 Provided some regions on the glass are clean (i.e., no ice nucleating particles) you may be condensing  
 62 liquid directly from the vapor. Freezing would then occur, for example, once a liquid domain touches an ice  
 63 domain. The latter could have been previously frozen or previously deposited. In either case, the existence  
 64 of liquid water would rationalize your exothermic uptake coefficients. Here, I’m assuming that Henry’s law  
 65 uptake (into the liquid) increases with decreasing temperature below 273 K.

66 Related Recommendations:

67 1) I recommend that you refer to your measurements as an uptake coefficients, as sorption coefficients, or  
 68 as an ice-gas partitioning coefficients. You complicate the reading by using all of these. The place to do  
 69 this is in the Introduction not in Section 2.6.

70 2) Since the cloud chemistry community uses “partitioning” to describe analyte mass continuity, within an  
 71 element of cloud, I recommend that you not use partitioning to modify the coefficient you are evaluating.  
 72 Similarly, I encourage that you do not use “partitioning” as a place holder for the process you are  
 73 investigating.

74 3) I do not think you need Equation 2. There are tables of saturation pressure in the textbooks. E.g., Rogers  
 75 and Yau, Third Edition, Elsevier, 1989; Table 2.1. The important thing is that you check your Equation 2 for  
 76 dimensional consistency and for adequate numerical precision compared to tabulated data.

77 4) There is no reason to report the gas constant with six-digit precision or to report the reciprocal  
 78 temperatures (p. 14) with four-digit precision.

79 5) The density of ice can be taken to be a constant.

80 Your discussion on L175-L187 should be revised. You are using aqueous solutions to generate a prescribed  
81 amount of gas-phase analyte within the flowtube. The  $[X]_{aq}$  (Equation 6) is what's required to produce a  
82 specified gas-phase mixing ratio (10 ppbv). So, I recommend that you put the target gas-phase mole  
83 fraction ( $10 \times 10^{-9}$ ), and your pressure, into Equation 6.

84 Please note:

85 L179. You are producing a partial pressure, within the flowtube, not a "gas concentration." This should be  
86 corrected here and elsewhere.

87 It's not clear why you have the superscript "cp" in Equation 6. Also, it's quite common to use  $K_h$ , not  $H$ , for  
88 the Henry solubility, at least in the cloud chemistry community.

89 About "breakthrough." I don't understand your statement that Kahnt et al. (2011) observed larger  
90 breakthrough, at lower relative humidities, but your absolute humidity is much lower. Do you mean that  
91 Kahnt et al. (2011) observed larger breakthrough at \_low\_ relative humidities? Additionally, relative  
92 humidity and absolute humidity are related, but it is not clear how to compare your humidity condition  
93 (absolute) to the humidity condition in Kahnt et al. (2011) (relative).

94 Please note the title of Kahnt et al. (2011): "Denuder sampling techniques for the determination  
95 of...derivatization methods." There are places where you use the modifier "derivation" instead of  
96 "derivatization." Please check throughout.

97

- 98 The word “massed” is used. Do you mean weighed? It seems that the mass of the ice was derived by  
99 weighing together with additional information. On L225-233 you say that the flow tube was rinsed  
100 (methanol), that the extract was “massed”, and that the solution was evaluated in a refractometer. The  
101 acquired information is sufficient for determining the mass of H<sub>2</sub>O that was extracted from the tube.
- 102 1) Please correct/change all instances of “massed”.
- 103 2) You refer to the “collected ice mass” on L159. Should this be “sampled ice mass” or “extracted sample  
104 mass”? There are other instances of “ice mass”. You should consider changing these, for clarity.
- 105 3) On L305-L309, you report the calculated ice mass (Equation 3) and you compare to the collected ice  
106 mass (aka, the “yield.”). In your procedure, it seems, the methanol does not capture all the ice. Hence, the  
107 expectation is calculated > measured. Looking at data from the -30 and -40 °C, that expectation is verified.  
108 In our paper (Huffman and Snider 2004), a calculation overpredicts the observed ice mass. Splintering of  
109 the ice sample, during the uptake experiments, was suspected. In your experiments, do you have evidence  
110 of splintering?
- 111 4) Your visual observations (L318-319) are contradictory. The coatings were “either over the entire surface”  
112 or “not evenly distributed.” Which of these best represents what you saw?
- 113 5) All one can visualize is a macroscopic ice deposit, not the (microscopic) nucleation sites. Accordingly, I  
114 recommend that you revise L321.

115 Contamination during the processing of the samples (the H<sub>2</sub>O samples and the cartridge samples) is a  
116 possibility. You addressed this on L325-L328. Your approach is to process blank ice samples grown from  
117 liquid.

118 1) Why not collect/process “blank” ice samples taken from the flowtube when it’s operated with no  
119 analyte?

120 2) You say that the blank signals were in the same range as analytical blanks, which were all below  
121 detection limit. It’s my opinion that you should tabulate the analytical blank values - or tabulate their  
122 average and standard deviation – and tabulate the same for the blanks ice samples.

123

124

125 I may have missed this. Did you do an analysis of analyte amount in denuder #1, denuder #2, and in the  
126 flowtube and use that information to quantify error in K coming exclusively from the chemical analysis  
127 method? This seems like a useful thing to do....mass must be conserved.

128

129

130 L39 - Neither Gautam et al. (2025) Seymore et al. (2025) are in the bibliography.

131

132

133 L502 – Neither Gautam et al. (2024) Seymore et al. (2024) are in the bibliography.

134

135

136 Regarding your tentative conclusion that a surface layer is the “single dominant influence” on uptake. This  
137 was examined by Valdez et al. (<https://doi.org/10.1029/JD094iD01p0109>). This reference is not in your  
138 bibliography.

139 **Less-than-major Corrections and Less-than-major Critiques:**

140 "ACN", define where this acronym is first used.

141 L144. Remove "using the hygrometer."

142 L150. Remove "which is equivalent to the diffusive flux."

143 L153. A cloud physics textbook (Rogers and Yau; Third Edition, Elsevier, 1989) says that the diffusivity is  
144 20% smaller at -40 °C compared to -20 °C.

145 L157. Please see my earlier comment about condensation and deposition. You are interpreting  $t_k$  as the  
146 time for "deposition", correct?

147 L202-L204. Is "hydrazone" different from "hydrazine" in DNPH?

148 L262-L267. I recommend that you not use "Cice" for the absolute mass of analyte in ice. Also, is the  
149 modifier "absolute" implying something? Recommend that you remove "absolute."

150 L275 You say: "These values describe the energy available for the uptake process." I do not agree with this.  
151 Think of DG is a placeholder for K. Also see my first critique.

152 L361 "...and water". Do you mean "...and ice"?

153 L411 "Endothermically" or "nonexothermically"? Be consistent.

154 L416-L417 I don't understand how photodegradation of MVK, within the atmosphere, can be the cause of  
155 the weak correlation with inverse temperature, in your laboratory study.

156 L430 "artificially". Is there a better way to say this?

157 L435 The letter "H" is being used to represent several properties. There is the Henry solubility (Equation 5),  
158 the enthalpy of solution (BTW, some refer to this as the enthalpy of gas-to-liquid transfer), and the enthalpy  
159 change you derive via the van't Hoff regression. You can avoid introducing another "H." Do that by  
160 acknowledging that the enthalpy change you derive for a rather cold experimental temperature may be  
161 significantly different from the reference-state enthalpy. Related to this, why not represent the Henry  
162 Solubility (Equation 5) with  $K_h$ ? That is common, and it would eliminate one of the "H" symbols.

163 L480 Which "solubility"? I think you are referring to the Henry Law solubility, but I'm not sure.

164 L456 Is this the first occurrence of "additivity"? It is not clear what you are implying by "additivity"

165 L457 I recommend something like this: "...could help to generalize descriptions of the uptake process in  
166 models"

167 L539 It is not clear what you are implying by "...void space."

168 L711 Check the format of the Warhaft reference.
